# Supplementary material for: Sex differences in bile acid homeostasis and excretion underlie the disparity in liver cancer incidence between males and females
Source: eLife. 2025 Dec 29;13:RP96783. doi: 10.7554/eLife.96783 (PMC12747522; doi:10.7554/eLife.96783)
Supplement: Figure 6—source data 1. — See the Excel sheet. [file elife-96783-fig6-data1.xlsx]

## Sheet: Sheet1
Sample	aMCA /bMCA	GLCA	HDCA	HCA	TaMCA/ TbMCA	TCA	TCDCA /TDCA	THDCA	TMDCA	UDCA	L-Zeatine(ISTD)
Data File	Area	Area	Area	Area	Area	Area	Area	Area	Area	Area	Area
S571 Hepatic BA	24999	11906	10078	6331	48391996	44862338	137076	41167	77543	901211	228925
S572 Hepatic BA	29947	6862	11256	2316	35405039	54776404	73866	87014	32636	929594	217271
S576 Hepatic BA	16125	16252	544	4695	66830221	46363698	148139	48917	81046	554959	228910
S577 Hepatic BA	13187	9564	44046	4178	39253264	42166329	70137	29461	39837	1109719	225580
S578 Hepatic BA	118885	10930	8984	27855	48907664	77124368	385953	315931	195435	9316	231741
E130 Hepatic BA	11915	11633	14875	1200	41280102	60435811	708138	19250	372627	349648	210908
E132 Hepatic BA	19436	10822	17848	1917	29385281	54176409	429144	11115	211606	27719	210698
E133 Hepatic BA	14238	11567	17305	2719	43312085	59791077	395725	11862	192153	361104	224916
E134 Hepatic BA	18711	10074	13014	2600	27725862	48032212	156717	7714	85486	4154	196094
E203 Hepatic BA	75425	13025	8924	16324	66763716	74320120	787877	378685	452008	261597	225550
E204 Hepatic BA	58668	10991	6651	10798	75161640	85364418	1005650	879123	527456	158692	218425
E569 Hepatic BA	54828	11955	12776	9491	64975655	68542208	765641	472245	405746	625630	207902
E571 Hepatic BA	58463	11177	25758	15010	69532367	69518480	364272	257905	182019	776012	242265
H276 Hepatic BA	39509	10052	11930	5861	46642240	60505341	744394	543939	443240	87331	235684
H278 Hepatic BA	80502	12732	1149	10860	64039319	70184730	699258	468623	367967	588582	228407
H279 Hepatic BA	42116	12466	8371	12797	61320743	66461481	502191	261841	264252	367677	220209
L723 Hepatic BA	291341	9866	11855	20111	43363819	101877049	1889497	386243	960578	8784	212442
L724 Hepatic BA	185705	12816	11364	18550	54002672	109656026	2494092	606611	1308141	2655	228159
L725 Hepatic BA	87238	8421	9269	8200	44043043	88010885	1287451	199206	686957	5432	226100
L726 Hepatic BA	183250	11168	12949	11849	39482443	99762268	1303307	259065	627611	6854	222823
H277 Hepatic BA	37736	9058	1898	13144	64503183	61933075	514025	181138	280748	1229553	221531
H277 Hepatic BA	9526	18679	24094	4702	58020142	59958356	206618	86560	104600	58031	236065
S572 serum	3107044	3572	219583	9325	61403964	20079376	141318	250935	46984	653427	162993
S576 serum	1209218	2254	103859	8703	21965722	1365125	68472	35620	42310	307172	138498
S577 serum	762369	3790	191366	6572	25073924	2241295	164032	72643	98627	636494	201902
S578 serum	361858	1781	196089	14761	47652147	17346119	327547	355715	181883	656355	167535
S589 serum	1027329	2538	280979	8246	23109673	3518928	216276	84902	125023	923439	170010
E130 serum	65903	2651	10997	6648	12044165	2019098	66212	3009	31389	30622	165580
E131 serum	290367	2552	19294	6330	15861718	1994413	55189	7580	27479	54500	161740
E132 serum	98248	2754	9606	5336	12050717	960672	59662	2888	31804	23106	179342
E133 serum	310931	3345	12374	8054	20783426	2056516	52079	5208	28654	32033	184841
E134 serum	547512	3374	8991	5186	13209843	1692005	21989	2848	11752	28882	181400
E203 serum	1425812	3493	329979	15322	32282913	2316875	245489	188534	142136	980544	335841
E204 serum	1339645	1945	523341	13002	38051144	6502849	320922	394958	160052	1190685	240706
E569 serum	2336958	2878	391389	13543	23511632	2409222	116890	185631	63506	1024640	225114
L720 serum	427938	4297	346852	2872	8879281	904451	973099	469593	35673	907868	200326
L721 serum	107806	4018	166663	2460	18363637	4099350	116086	460333	59556	546190	149885
L722 serum	40841	2789	206978	1393	9404503	2143591	89803	356397	50355	688885	148020
L723 serum	551286	3390	130914	3289	16696314	12633012	516079	244947	316169	408289	191001
L724 serum	640089	3118	151075	6422	31740081	13389355	839965	372738	515336	477907	175924
L725 serum	255916	3637	63723	1775	12231554	3372104	251364	96567	144197	180756	147832
L726 serum	886528	4519	112848	2881	13612516	6922551	259337	136189	129474	318406	160040
DKO 212 serum	950139	7526	363080	4754	9441572	1667096	97076	260959	51736	1124661	208944
DKO 213 serum	963597	5689	377585	11159	22501281	5394001	164595	235988	96187	1127026	159664
QC-1	13458	11935	44085	486	19246291	19974469	105935	122217	73475	10235	117289
QC-2	8106	10636	1209	429	20773837	20079786	143134	144291	81342	10148	122443
QC-3	6539	10837	2738	356	19582126	19702342	155201	146348	86477	179612	120160
QC-4	6014	10952	27720	624	20695329	18646719	164544	149130	97044	411932	122624
